# Supplementary material for: HMGA2 Supports Cancer Hallmarks in Triple-Negative Breast Cancer
Source: MDPI journal article supplement (doi:10.3390/cancers13205197), 2021-10-16

Cal-51

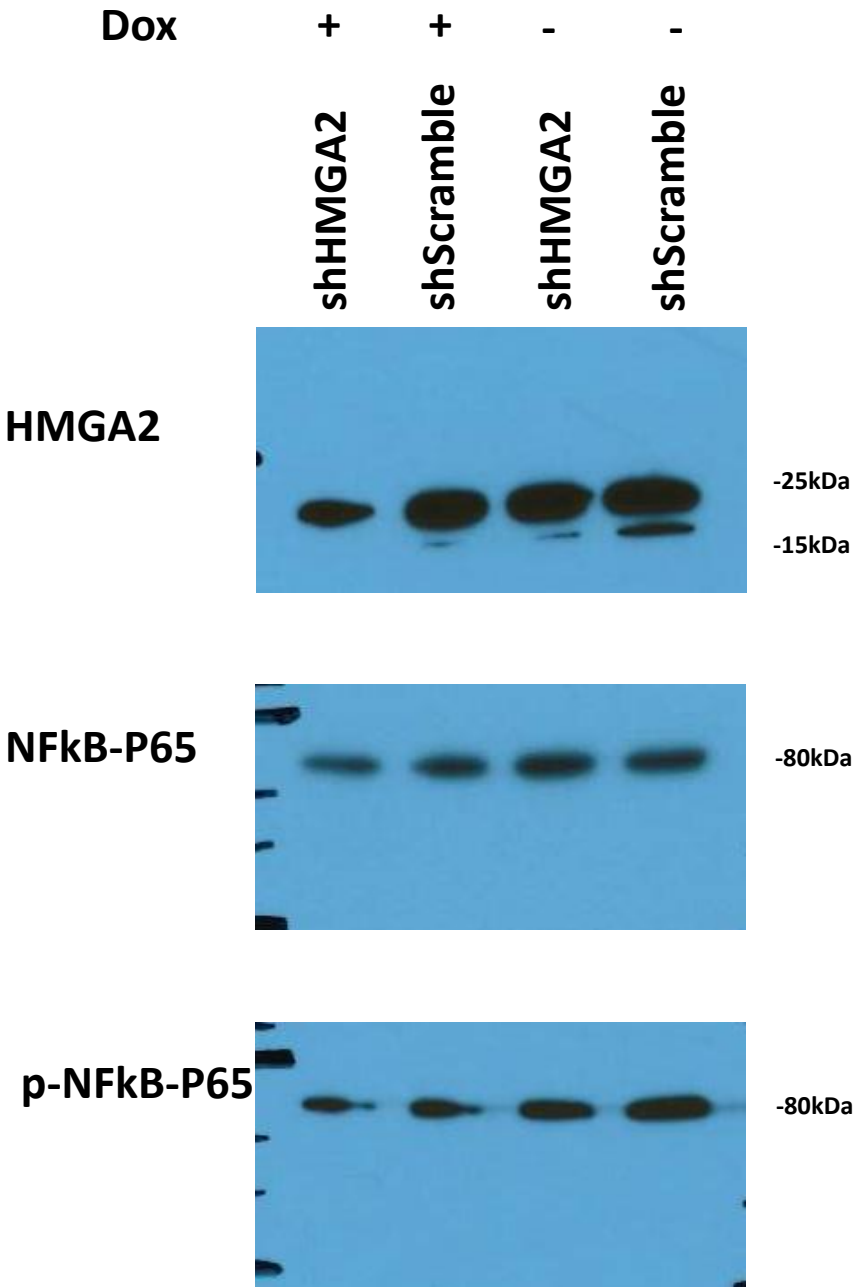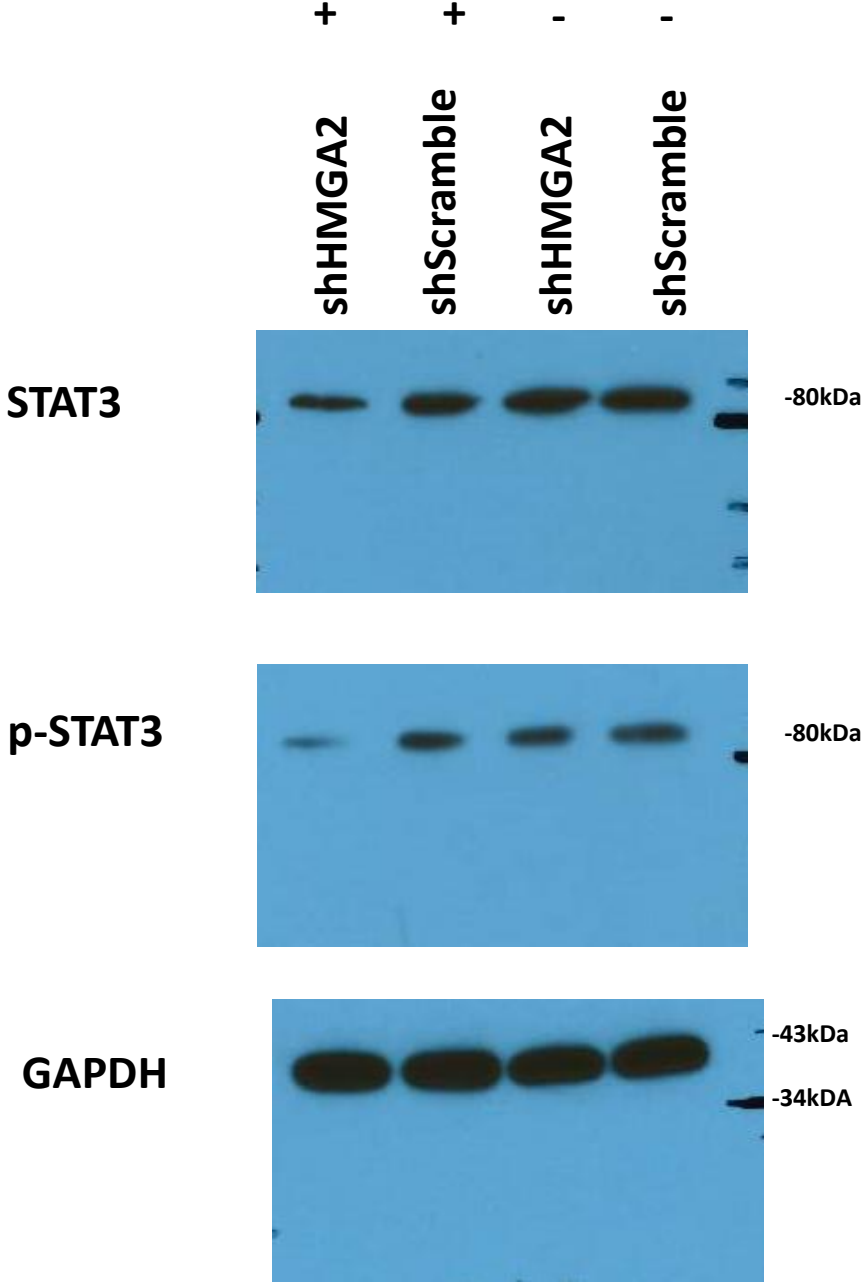

MDA-MB-231

Dox

+

+

-

-

shHMGA2

shScramble

shHMGA2

shScramble

HMGA2

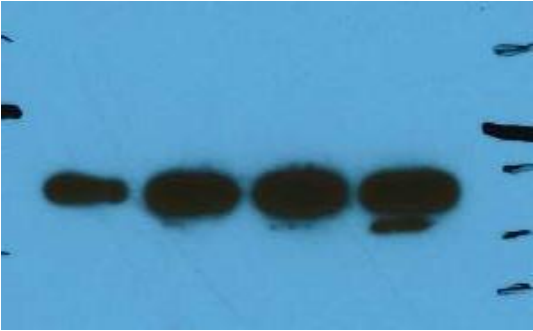

NFkB-P65

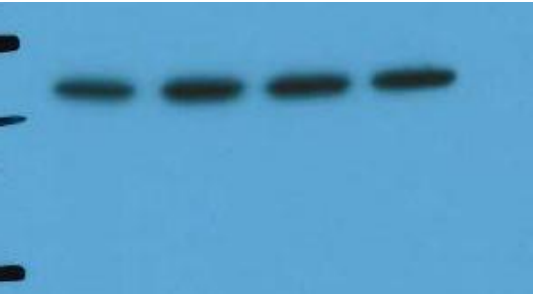

p-NFkB-P65

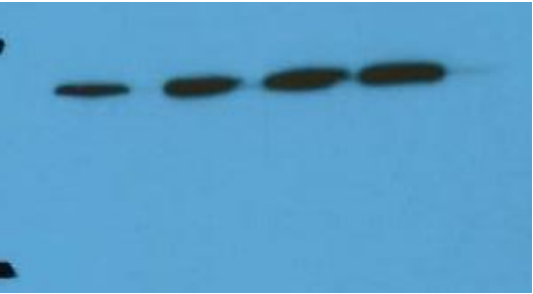

+

+

-

-

shHMGA2

shScramble

shHMGA2

shScramble

STAT3

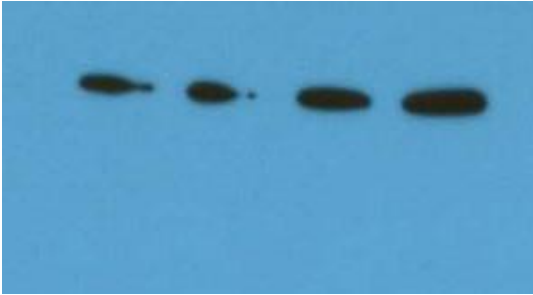

p-STAT3

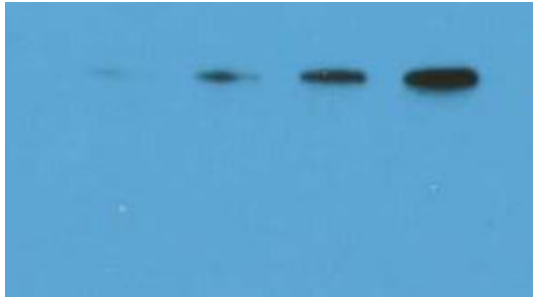

GAPDH

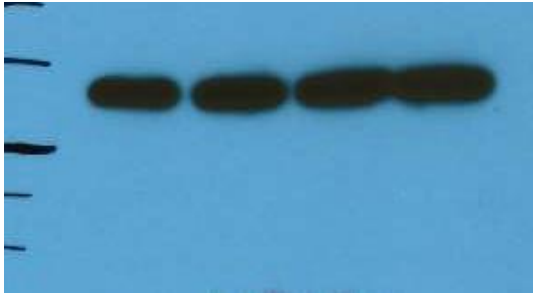

Supplement: s1 [file s1]
